# Supplementary material
Source: PubMed Central journal article supplement (PMC2744571)
Supplement: blood-2009-01-197947_1.pdf [file blood-2009-01-197947_1.pdf]

Primers used for Taqman real-time PCR assay were purchased from Applied Biosystems:

| Assay ID      | Gene Symbol                       |
|---------------|-----------------------------------|
| Mm00487803_m1 | <i>mc-Myc</i>                     |
| Mm00515853_m1 | <i>mGfi1</i>                      |
| Mm00484678_m1 | <i>mGata1</i>                     |
| Mm00492300_m1 | <i>mGata2</i>                     |
| Mm00440310_m1 | <i>mMpl</i>                       |
| Mm00501741_m1 | <i>mc-Myb</i>                     |
| Mm00494336_m1 | <i>mFog1</i>                      |
| Mm00484410_m1 | <i>mFli1</i>                      |
| Mm00488142_m1 | <i>mPu.1</i>                      |
| Mm00516096_m1 | <i>mEklf1</i>                     |
| Mm00432360_m1 | <i>mcyclin D1</i>                 |
| Mm00438072_m1 | <i>mcyclin D2</i>                 |
| Mm01273583_m1 | <i>mcyclin D3</i>                 |
| 4352933E      | <i>m<math>\beta</math>1-Actin</i> |

Primers used for SYBR Green real-time PCR assay

| Gene                               | Forward Primer                      | Reverse Primer                  |
|------------------------------------|-------------------------------------|---------------------------------|
| <i><math>\beta</math>1-Tubulin</i> | 5'-gcatgatgctggattcctcaagtctctgg-3' | 5'-cgggtttctccgtccacagcaaagt-3' |
| <i>NF-E2</i>                       | 5'-gacttggcaagagatcatgt-3'          | 5'-atatgttgagggtggcagt-3'       |
| <i>PF4</i>                         | 5'-gtgtgtgaagaccatctct-3'           | 5'-cattctcagggtggctat-3'        |
| <i>c-Myc</i>                       | 5'-ctggatttctttgggcgtt-3'           | 5'-tggtgaagttcacgttgaggg-3'     |
| <i>GAPDH</i>                       | 5'-accacagtccatgccatcac-3'          | 5'-tccaccacctgttgcgtga-3'       |
| <i>l-Myc</i>                       | 5'-acggcactcgtctggaa-3'             | 5'-gt gactggcttccggatgc-3'      |
| <i>n-Myc</i>                       | 5'-tccggagaggataaccttgagc-3'        | 5'-cggtgaccacatcgatttcc-3'      |
