# Supplementary material
Source: PubMed Central journal article supplement (PMC2744571)
Supplement: blood-2009-01-197947_2.pdf [file blood-2009-01-197947_2.pdf]

| <b>Full definition</b>             | <b>Abbreviation</b>       | <b>Markers</b>                                                                                                 |
|------------------------------------|---------------------------|----------------------------------------------------------------------------------------------------------------|
| Long-term HSCs                     | LSKF <sup>-</sup> LT-HSCs | Lin <sup>-</sup> IL7R <sup>-</sup> Sca1 <sup>+</sup> c-kit <sup>+</sup> flk2 <sup>-</sup>                      |
| Short-term HSCs                    | LSKF <sup>+</sup> ST-HSCs | Lin <sup>-</sup> IL7R <sup>-</sup> Sca1 <sup>+</sup> c-kit <sup>+</sup> flk2 <sup>+</sup>                      |
| Common myeloid progenitors         | CMFs                      | Lin <sup>-</sup> IL7R <sup>-</sup> Sca1 <sup>-</sup> c-kit <sup>+</sup> CD34 <sup>+</sup> CD16/32 <sup>-</sup> |
| Granulocyte/monocyte precursors    | GMPs                      | Lin <sup>-</sup> IL7R <sup>-</sup> Sca1 <sup>-</sup> c-kit <sup>+</sup> CD34 <sup>+</sup> CD16/32 <sup>+</sup> |
| Megakaryocyte/Erythroid precursors | MEPs                      | Lin <sup>-</sup> IL7R <sup>-</sup> Sca1 <sup>-</sup> c-kit <sup>+</sup> CD34 <sup>-</sup> CD16/32 <sup>-</sup> |
| Common lymphocyte progenitors      | CLPs                      | Lin <sup>-</sup> IL7R <sup>+</sup> Sca1 <sup>low</sup> c-kit <sup>low</sup>                                    |
| Megakaryocyte progenitors          | Mk-Ps                     | Lin <sup>-</sup> IL7R <sup>-</sup> Sca1 <sup>-</sup> c-kit <sup>+</sup> CD41 <sup>+</sup> CD9 <sup>+</sup>     |
| Mature megakaryocytes              | Mks                       | Lin <sup>-</sup> c-kit <sup>-</sup> CD41 <sup>+</sup>                                                          |
| Erythrocyte progenitors            | Ery-Ps                    | Mac1 <sup>-</sup> Gr1 <sup>-</sup> CD71 <sup>+</sup> Ter119 <sup>-</sup>                                       |
| Erythrocytic blasts                | Ery-Bs                    | Mac1 <sup>-</sup> Gr1 <sup>-</sup> CD71 <sup>+</sup> Ter119 <sup>+</sup>                                       |
| Erythrocytes                       | Erys                      | Mac1 <sup>-</sup> Gr1 <sup>-</sup> CD71 <sup>-</sup> Ter119 <sup>+</sup>                                       |
